# Supplementary material
Source: HighWire-hosted journal article supplement (https://jnm.snmjournals.org/highwire/filestream/95328/field_highwire_adjunct_files/0/208215_Supplemental_Data.pdf)
Supplement: 208215_Supplemental_Data.pdf [file 208215_Supplemental_Data.pdf]

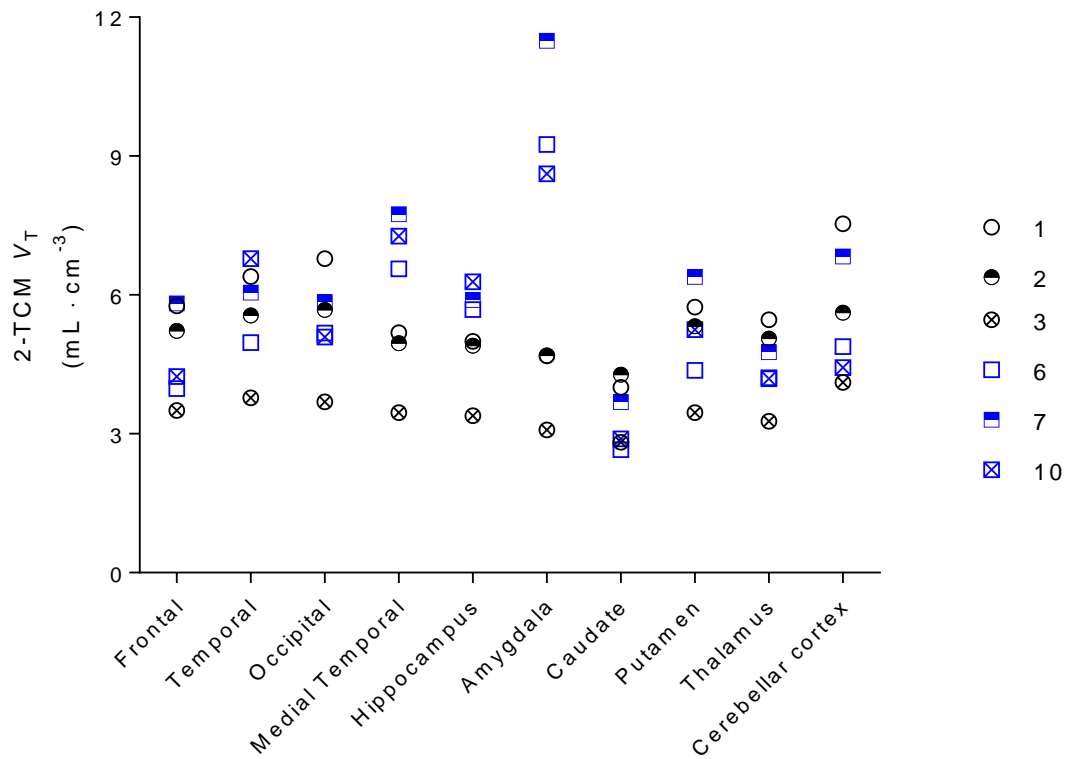

**SUPPLEMENTAL FIGURE 1.** Comparison of total  $V_T$  in various brain regions between cognitively HE subjects (1, 2, and 3) and AD subjects (6, 7, and 10) who received arterial sampling.  $V_T$  values were calculated using unconstrained 2-tissue compartmental model (2-TCM).

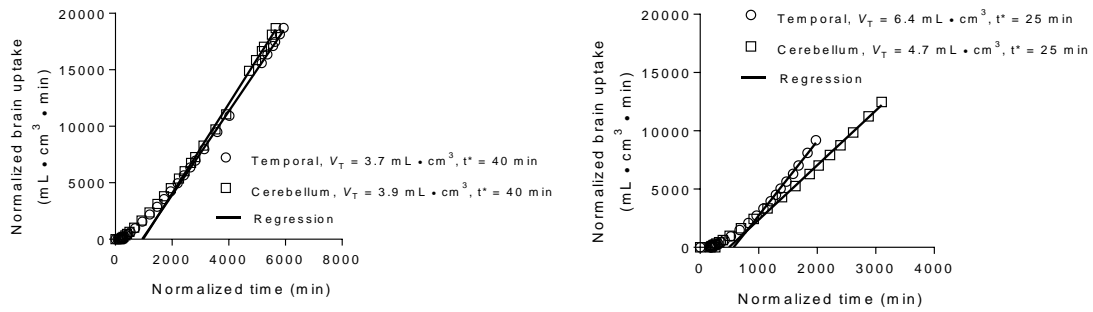

**SUPPLEMENTAL FIGURE 2.** Regional Logan plots (open symbols) and linear regressions (solid lines) derived from invasive Logan plot in a representative HE (Subject 3 – left plot) and AD (Subject 10 – right plot). Normalized time on x-axis is derived by the equation:  $\int_0^T C_p(t)dt/C_t(T)$ . Normalized brain uptake on y-axis is derived by the equation:  $\int_0^T C_t(t)dt/C_t(T)$ .

A

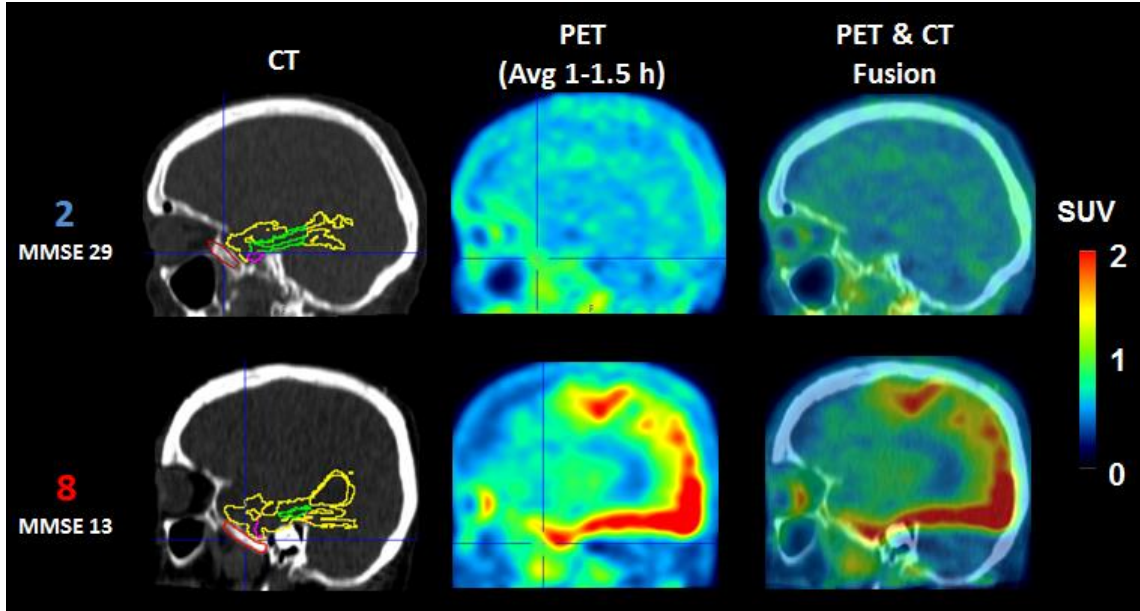

B

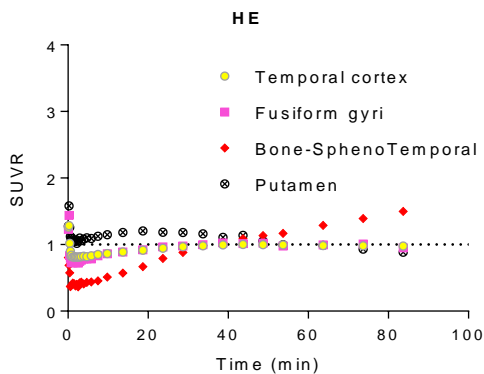

C

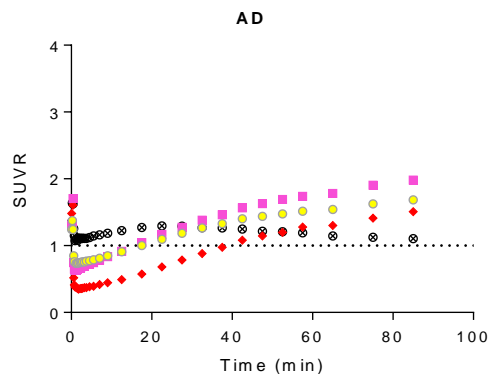

**SUPPLEMENTAL FIGURE 3.** Effect of bone uptake due to potential defluorination on brain cortical uptake. (A) Sagittal cross-sectional images (CT, PET, and PET and CT fusion) of a representative HE (2) subject and AD (8) subject showing atlas-derived regional VOI overlays (temporal cortex in yellow, fusiform gyri in pink, parahippocampal gyri in green) and manually drawn speno-temporal bone VOIs (in red). PET images are averaged between 60-90 min and are color scaled as SUV between 0 and 2. (B) Regional (Brain cortices,

adjacent bone, and putamen) SUVR time course in HE subjects with cerebellar cortex as a reference. Curves represent a mean of 4 subjects. (C) Regional (Brain cortices, adjacent bone, putamen) SUVR time course in AD subjects with cerebellar cortex as reference. Curves represent a mean of 6 subjects.

**SUPPLEMENTAL TABLE 1: CSF, Amyloid PET, and MRI characteristics in AD cohort**

| Subject ID | Clinical diagnosis | CSF                          |                           |                                          | Amyloid PET  | MRI   |       |       |                         |
|------------|--------------------|------------------------------|---------------------------|------------------------------------------|--------------|-------|-------|-------|-------------------------|
|            |                    | A $\beta$ 42<br>(>853 pg/mL) | Total tau<br>(<400 pg/mL) | <sup>181</sup> phosphotau<br>(<65 pg/mL) | (SUVR <1.29) | MTA R | MTA L | ARWMC | GRE<br>Hyperintensities |
| 5          | Dementia           | 439                          | 163                       | 29.4                                     | N/A          | 2     | 2     | 3     | 8                       |
| 6          | Dementia           | N/A                          | N/A                       | N/A                                      | N/A          | 0     | 1     | 1     | 1                       |
| 7          | MCI                | 707                          | 496                       | 66                                       | 1.73         | 3     | 3     | 0     | 0                       |
| 8          | Dementia           | 409                          | 1042                      | 164                                      | N/A          | 3     | 3     | 1     | 0                       |
| 9          | Dementia           | N/A                          | N/A                       | N/A                                      | N/A          | 2     | 3     | 0     | 0                       |
| 10         | MCI                | 782                          | 1336                      | 165                                      | 1.71         | 2     | 3     | 0     | 0                       |

ARWMC = Age-related white matter change (based on reference 1), CSF = Cerebrospinal fluid (cutoff criteria based on reference 2), GRE = Gradient recalled echo, MCI = Mild cognitive impairment, MTA R/L= Medial temporal lobe atrophy score (based on reference 3) right/left, N/A = not applicable, SUVR = Regional standard uptake value ratio. The values between brackets indicate the normal range. The amyloid PET was performed using <sup>18</sup>F-florbetaben.

**SUPPLEMENTAL TABLE 2:** Rate constants and total distribution volumes from two-tissue compartment model in HE subjects

| Brain region      | Two-tissue compartmental rate constants            |        |                            |        |                            |         |                            |         | Two-tissue $V_T$ (mL • cm <sup>-3</sup> ) |   |     |        |
|-------------------|----------------------------------------------------|--------|----------------------------|--------|----------------------------|---------|----------------------------|---------|-------------------------------------------|---|-----|--------|
|                   | $K_1$ (mL • cm <sup>-3</sup> • min <sup>-1</sup> ) |        | $k_2$ (min <sup>-1</sup> ) |        | $k_3$ (min <sup>-1</sup> ) |         | $k_4$ (min <sup>-1</sup> ) |         |                                           |   |     |        |
| Temporal          | 0.326                                              | (1.2%) | 0.135                      | (2.1%) | 0.012                      | (6.5%)  | 0.012                      | (8.4%)  | 5.2                                       | ± | 1.3 | (2.2%) |
| Hippocampus       | 0.283                                              | (1.5%) | 0.115                      | (3%)   | 0.012                      | (11.3%) | 0.017                      | (12.3%) | 4.4                                       | ± | 0.9 | (2.2%) |
| Amygdala          | 0.286                                              | (2.5%) | 0.108                      | (4.6%) | 0.008                      | (18.2%) | 0.013                      | (23.4%) | 4.2                                       | ± | 0.9 | (4%)   |
| Caudate           | 0.274                                              | (1.6%) | 0.120                      | (3.1%) | 0.012                      | (14.1%) | 0.016                      | (12.1%) | 3.7                                       | ± | 0.8 | (2%)   |
| Putamen           | 0.417                                              | (1.3%) | 0.124                      | (2.9%) | 0.010                      | (17.2%) | 0.023                      | (14%)   | 4.8                                       | ± | 1.2 | (1.4%) |
| Cerebellar cortex | 0.349                                              | (1.2%) | 0.143                      | (2%)   | 0.010                      | (6%)    | 0.010                      | (9.3%)  | 5.8                                       | ± | 1.7 | (2.8%) |

Rate constants are presented as median values and  $V_T$  values as mean ± SD from 3 subjects. For each brain region, median standard errors are listed in parentheses and are expressed as % of the variable itself.

**SUPPLEMENTAL TABLE 3:** Rate constants and total distribution volumes from two-tissue compartment model in AD subjects

| Brain region      | Two-tissue compartmental rate constants            |                            |                            |                            | Two-tissue $V_T$ (mL • cm <sup>-3</sup> ) |
|-------------------|----------------------------------------------------|----------------------------|----------------------------|----------------------------|-------------------------------------------|
|                   | $K_1$ (mL • cm <sup>-3</sup> • min <sup>-1</sup> ) | $k_2$ (min <sup>-1</sup> ) | $k_3$ (min <sup>-1</sup> ) | $k_4$ (min <sup>-1</sup> ) |                                           |
| Temporal          | 0.336 (1.1%)                                       | 0.144 (2.2%)               | 0.022 (4.1%)               | 0.015 (5.2%)               | 5.9 ± 0.9 (2%)                            |
| Hippocampus       | 0.267 (1.8%)                                       | 0.117 (4.5%)               | 0.033 (8.2%)               | 0.018 (8.4%)               | 6.0 ± 0.3 (2.9%)                          |
| Amygdala          | 0.234 (2.3%)                                       | 0.103 (5.9%)               | 0.035 (9.1%)               | 0.011 (13.9%)              | 9.8 ± 1.5 (6.6%)                          |
| Caudate           | 0.233 (2.5%)                                       | 0.141 (5.3%)               | 0.021 (13.2%)              | 0.023 (10.5%)              | 3.1 ± 0.5 (2.1%)                          |
| Putamen           | 0.470 (1.2%)                                       | 0.145 (2.8%)               | 0.021 (9.2%)               | 0.034 (6.7%)               | 5.3 ± 1.0 (1%)                            |
| Cerebellar cortex | 0.335 (0.9%)                                       | 0.145 (1.7%)               | 0.017 (4.6%)               | 0.016 (6.4%)               | 5.4 ± 1.3 (1.7%)                          |

Rate constants are presented as median values and  $V_T$  values as mean ± SD from three subjects. For each brain region, median standard errors are listed in parentheses and are expressed as % of the variable itself.

**SUPPLEMENTAL TABLE 4:** SUVRs and DVRs from different models in HE subjects

| <b>Brain region</b> | <b>SUVR<sub>60-90 min</sub></b> | <b>DVR<sub>2-TCM</sub></b> | <b>DVR<sub>Logan Plot</sub></b> | <b>DVR<sub>LoganRefTissue</sub></b> |
|---------------------|---------------------------------|----------------------------|---------------------------------|-------------------------------------|
| Temporal            | 0.98 ± 0.07                     | 0.88 ± 0.08                | 0.92 ± 0.06                     | 0.94 ± 0.04                         |
| Hippocampus         | 0.93 ± 0.10                     | 0.76 ± 0.12                | 0.82 ± 0.09                     | 0.91 ± 0.07                         |
| Amygdala            | 0.84 ± 0.11                     | 0.70 ± 0.08                | 0.75 ± 0.09                     | 0.84 ± 0.07                         |
| Caudate             | 0.79 ± 0.06                     | 0.67 ± 0.10                | 0.70 ± 0.07                     | 0.79 ± 0.04                         |
| Putamen             | 0.91 ± 0.04                     | 0.84 ± 0.11                | 0.89 ± 0.06                     | 1.01 ± 0.06                         |

DVR<sub>2TCM</sub> and DVR<sub>Logan Plot</sub> values are Mean ± SD from n = 3 HE subjects, whereas SUVR<sub>60-90 min</sub> and DVR<sub>LoganRefTissue</sub> are from n = 4

HE subjects



**SUPPLEMENTAL TABLE 5: SUVRs and DVRs from different models in AD subjects**

| <b>Brain region</b> | <b>SUVR<sub>60-90 min</sub></b> | <b>DVR<sub>2TCM</sub></b> | <b>DVR<sub>Logan Plot</sub></b> | <b>DVR<sub>LoganRefTissue</sub></b> |
|---------------------|---------------------------------|---------------------------|---------------------------------|-------------------------------------|
| Temporal            | 1.64 ± 0.72                     | 1.12 ± 0.21               | 1.12 ± 0.22                     | 1.39 ± 0.57                         |
| Hippocampus         | 1.37 ± 0.25                     | 1.16 ± 0.05               | 1.20 ± 0.13                     | 0.99 ± 0.50                         |
| Amygdala            | 1.67 ± 0.40                     | 1.61 ± 0.14               | 1.73 ± 0.15                     | 1.20 ± 0.60                         |
| Caudate             | 0.71 ± 0.16                     | 0.62 ± 0.06               | 0.65 ± 0.08                     | 0.68 ± 0.10                         |
| Putamen             | 1.15 ± 0.35                     | 0.97 ± 0.12               | 1.03 ± 0.08                     | 1.19 ± 0.20                         |

DVR<sub>2TCM</sub> and DVR<sub>Logan Plot</sub> values are Mean ± SD from n = 3 AD subjects, whereas SUVR<sub>60-90 min</sub> and DVR<sub>LoganRefTissue</sub> are from n = 6 AD subjects

**SUPPLEMENTAL TABLE 6: Correlations between SUVR and DVRs across subjects**

| Subject | SUVR <sub>60-90min</sub> vs. DVR <sub>2-TCM</sub> |       |           | SUVR <sub>60-90min</sub> vs. DVR <sub>Logan Plot</sub> |       |           | SUVR <sub>60-90min</sub> vs. DVR <sub>Logan Ref.Tissue</sub> |       |           |
|---------|---------------------------------------------------|-------|-----------|--------------------------------------------------------|-------|-----------|--------------------------------------------------------------|-------|-----------|
|         | R <sup>2</sup>                                    | Slope | Intercept | R <sup>2</sup>                                         | Slope | Intercept | R <sup>2</sup>                                               | Slope | Intercept |
| 1       | 0.61                                              | 0.64  | 0.39      | 0.78                                                   | 0.8   | 0.21      | 0.88                                                         | 1.18  | -0.17     |
| 2       | 0.54                                              | 0.80  | 0.29      | 0.65                                                   | 1.01  | 0.06      | 0.5                                                          | 1.02  | 0         |
| 3       | 0.77                                              | 0.99  | 0.05      | 0.78                                                   | 0.86  | 0.17      | 0.63                                                         | 1.07  | -0.08     |
| 4       | N/A                                               | N/A   | N/A       | N/A                                                    | N/A   | N/A       | 0.31                                                         | 0.9   | 0.14      |
| 5       | N/A                                               | N/A   | N/A       | N/A                                                    | N/A   | N/A       | 0.85                                                         | 1.17  | -0.01     |
| 6       | 0.94                                              | 1.14  | -0.09     | 0.95                                                   | 1.13  | -0.12     | 0.83                                                         | 1.47  | -0.44     |
| 7       | 0.96                                              | 1.06  | -0.09     | 0.94                                                   | 1     | 0         | 0.79                                                         | 1.36  | -0.29     |
| 8       | N/A                                               | N/A   | N/A       | N/A                                                    | N/A   | N/A       | 0.98                                                         | 1.08  | 0.14      |
| 9       | N/A                                               | N/A   | N/A       | N/A                                                    | N/A   | N/A       | 0.98                                                         | 1.38  | -0.22     |
| 10      | 0.96                                              | 1.13  | -0.09     | 0.96                                                   | 1.11  | -0.08     | 0.9                                                          | 1.51  | -0.45     |

N/A: Not applicable due to no arterial sampling.

## SUPPLEMENTAL REFERENCES

1. Wahlund LO, Barkhof F, Fazekas F, et al. A new rating scale for age-related white matter changes applicable to MRI and CT. *Stroke*. Jun 2001; 32(6):1318-1322.
2. Adamczuk K, Schaefferbeke J, Vanderstichele HM, et al. Diagnostic value of cerebrospinal fluid A $\beta$  ratios in preclinical Alzheimer's disease. *Alzheimers Res Ther*. Dec 2015; 18;7(1):75.
3. Scheltens P, Weinstein HC, Leys D. Neuro-imaging in the diagnosis of Alzheimer's disease. I. Computer tomography and magnetic resonance imaging. *Clin Neurol Neurosurg*. 1992;94(4):277-289.
